# Supplementary material for: Effect of metronidazole on vaginal microbiota associated with asymptomatic bacterial vaginosis
Source: PubMed Central journal article supplement — Access Microbiol. 2021 May 4;3(5):000226. doi: 10.1099/acmi.0.000226 (PMC8209634; doi:10.1099/acmi.0.000226), 2021-05-04
Supplement: acmi-3-0226-s001.pdf [file acmi-3-0226-s001.pdf]

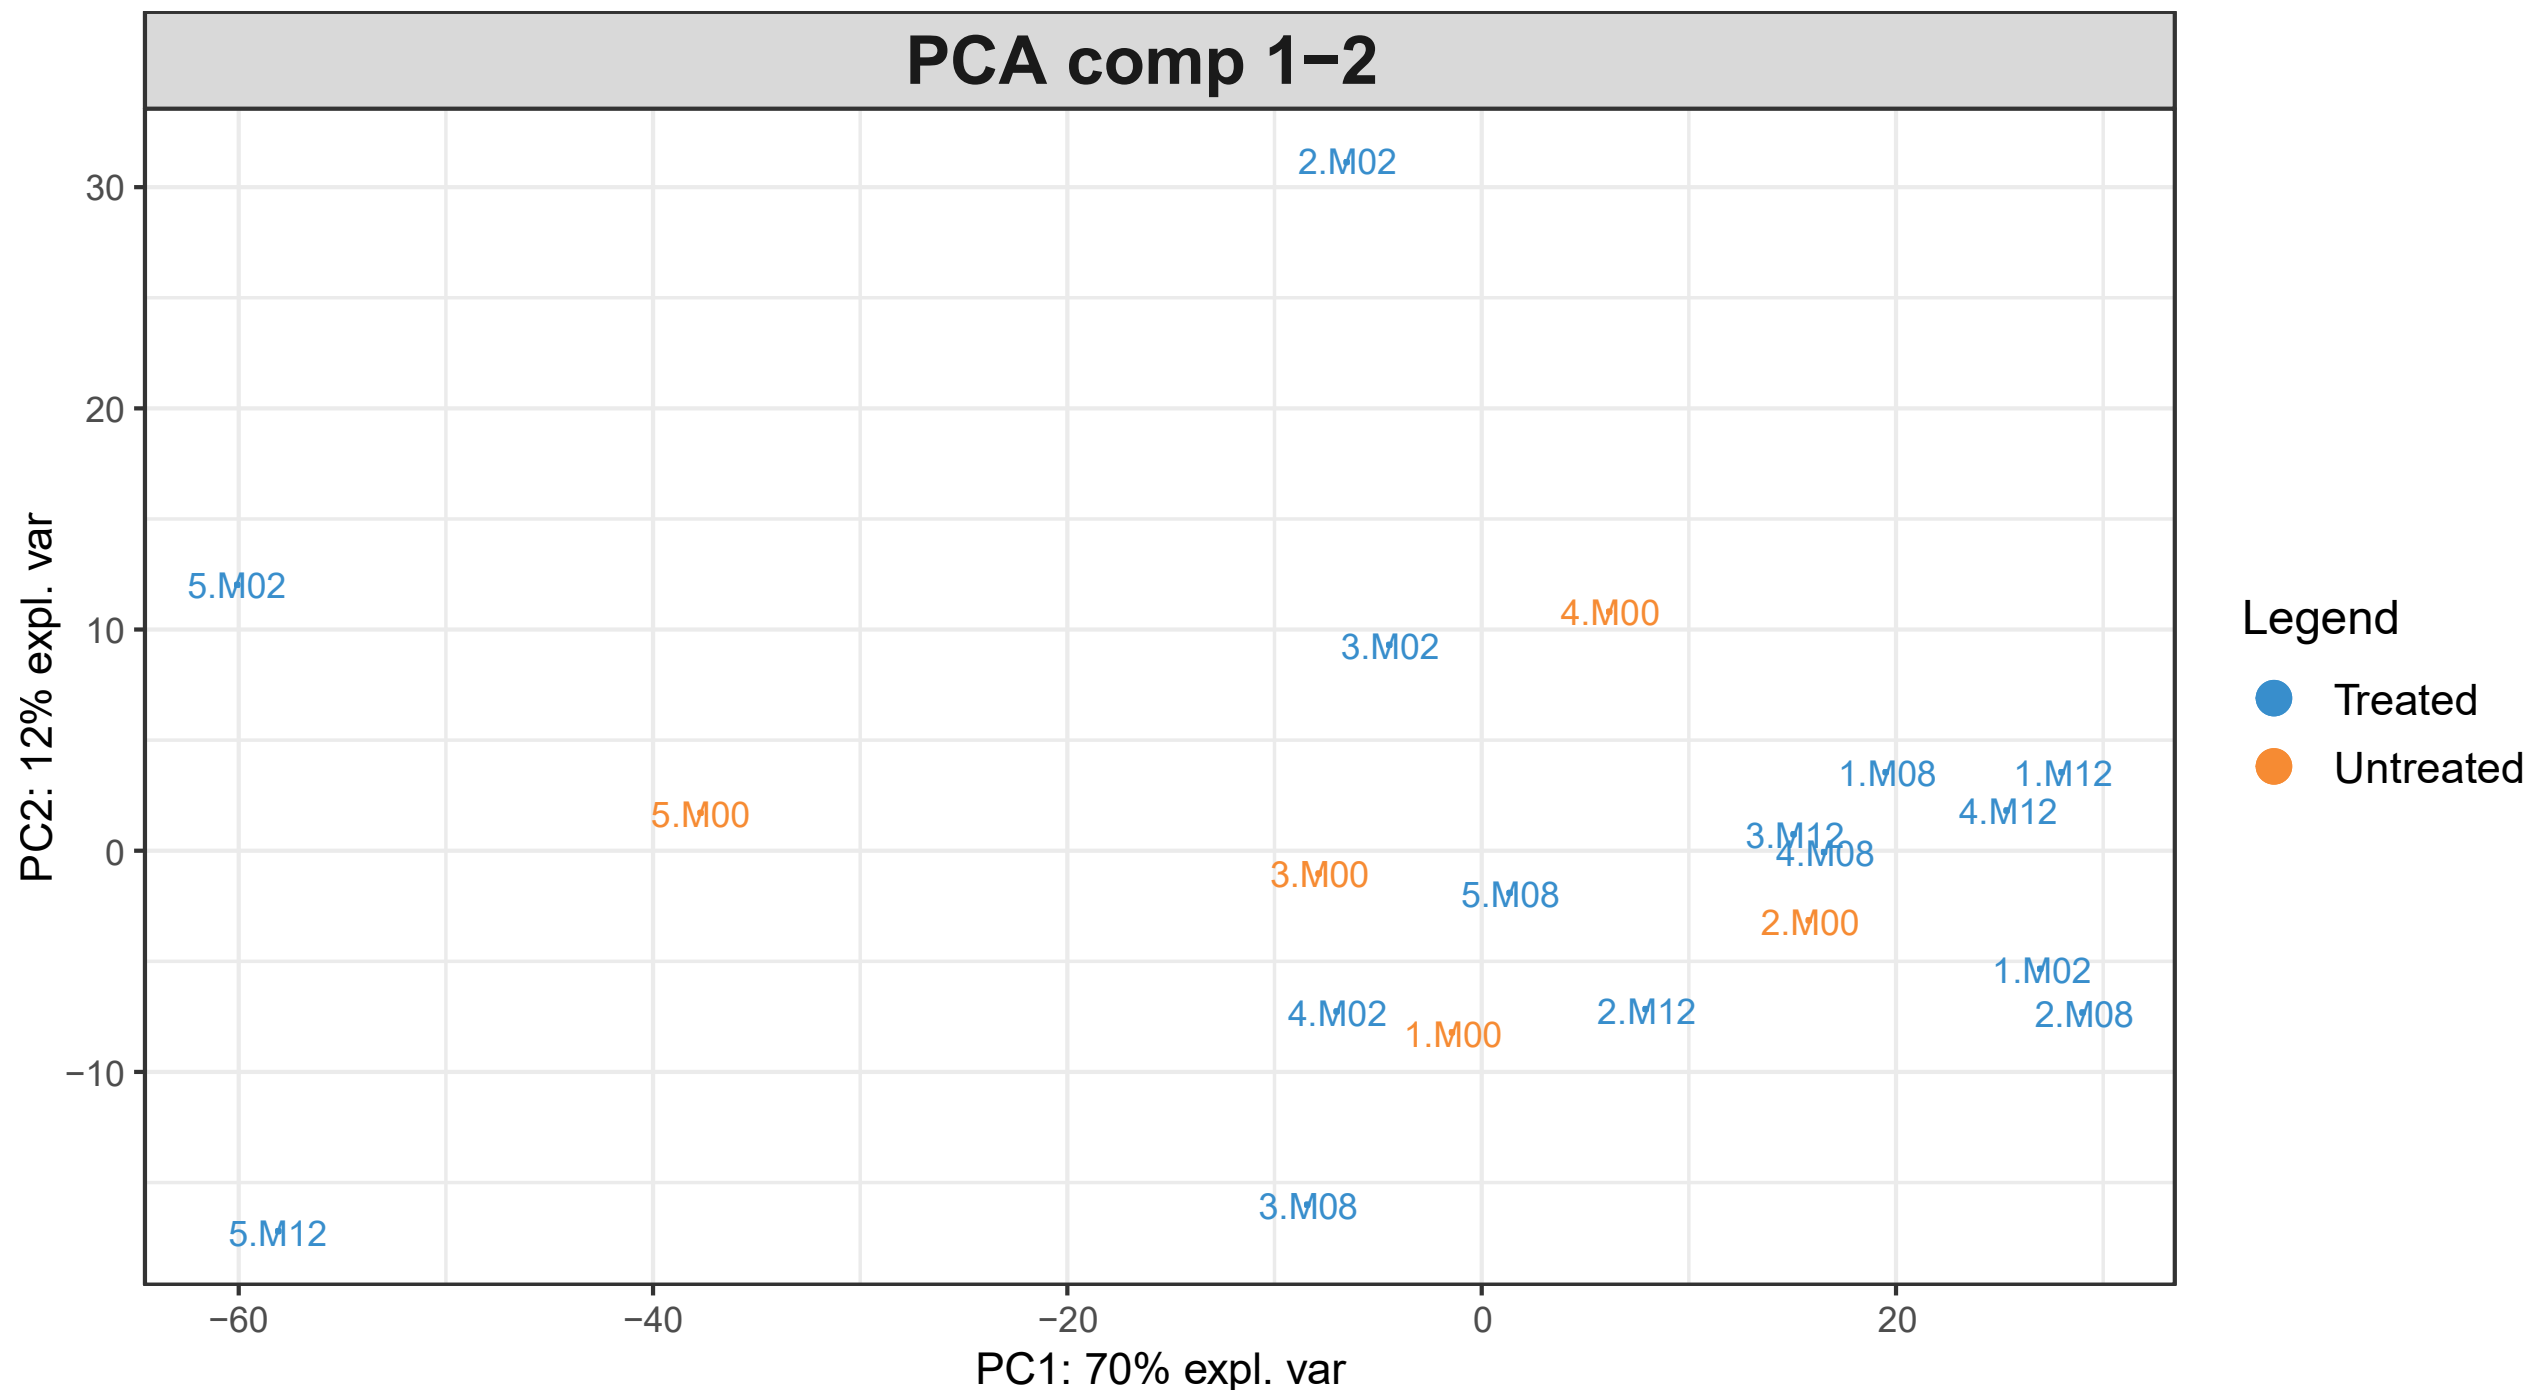

**Figure S1:** Principal Component Analysis (PCA) of the variance in the vaginal microbiota. The samples are projected into the first two principal components, which preserve the maximum variance of the data. Treated participants are colored in blue, while untreated ones are colored in orange. Each sample is represented by X.MYY, where X means the participant number, and YY represents the month of data collection.
